# Supplementary material for: Influence of Fluorine Substitution on the Optical, Thermal, Electrochemical and Structural Properties of Carbazole-Benzothiadiazole Dicarboxylic Imide Alternate Copolymers
Source: MDPI journal article supplement (doi:10.3390/polym12122910), 2020-12-04
Supplement: s1 [file s1]

## Supplementary Information

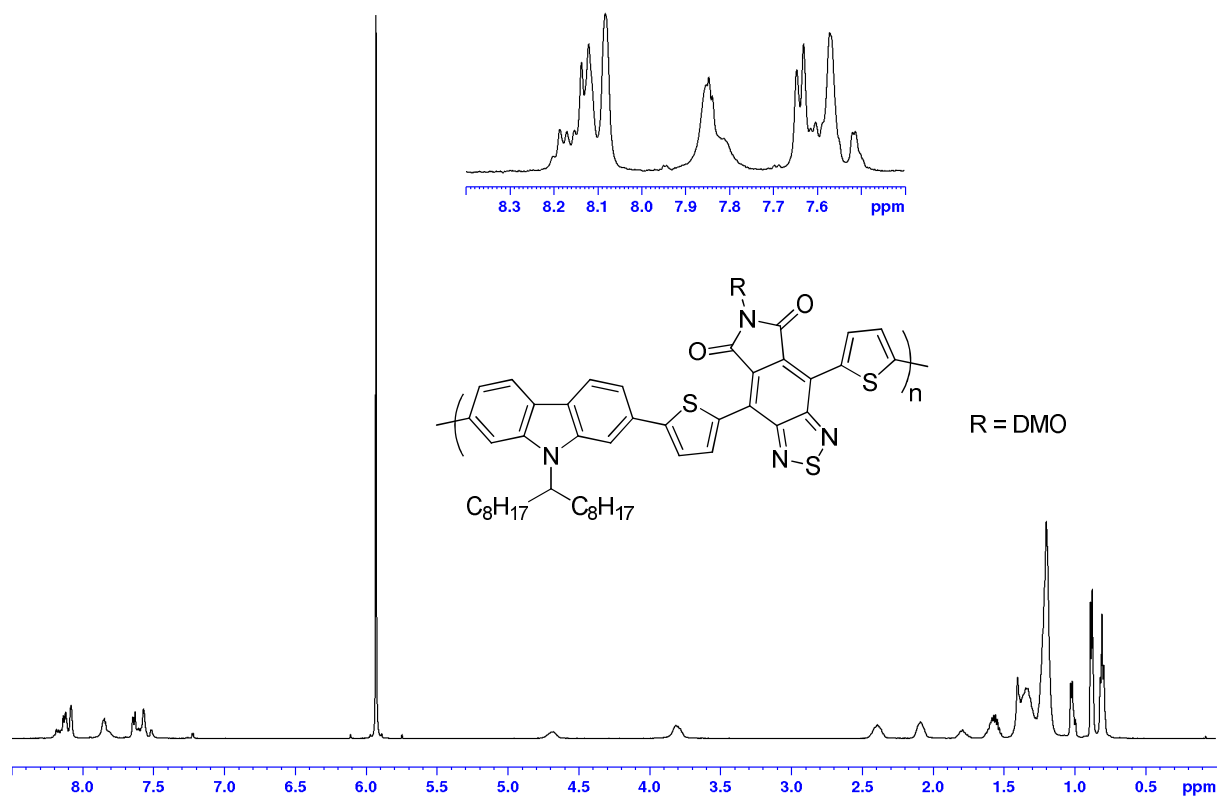

**Figure S1.**  $^1\text{H}$  NMR spectrum of PCDTBTDI-DMO in  $\text{C}_2\text{D}_2\text{Cl}_4$  at  $100\text{ }^\circ\text{C}$

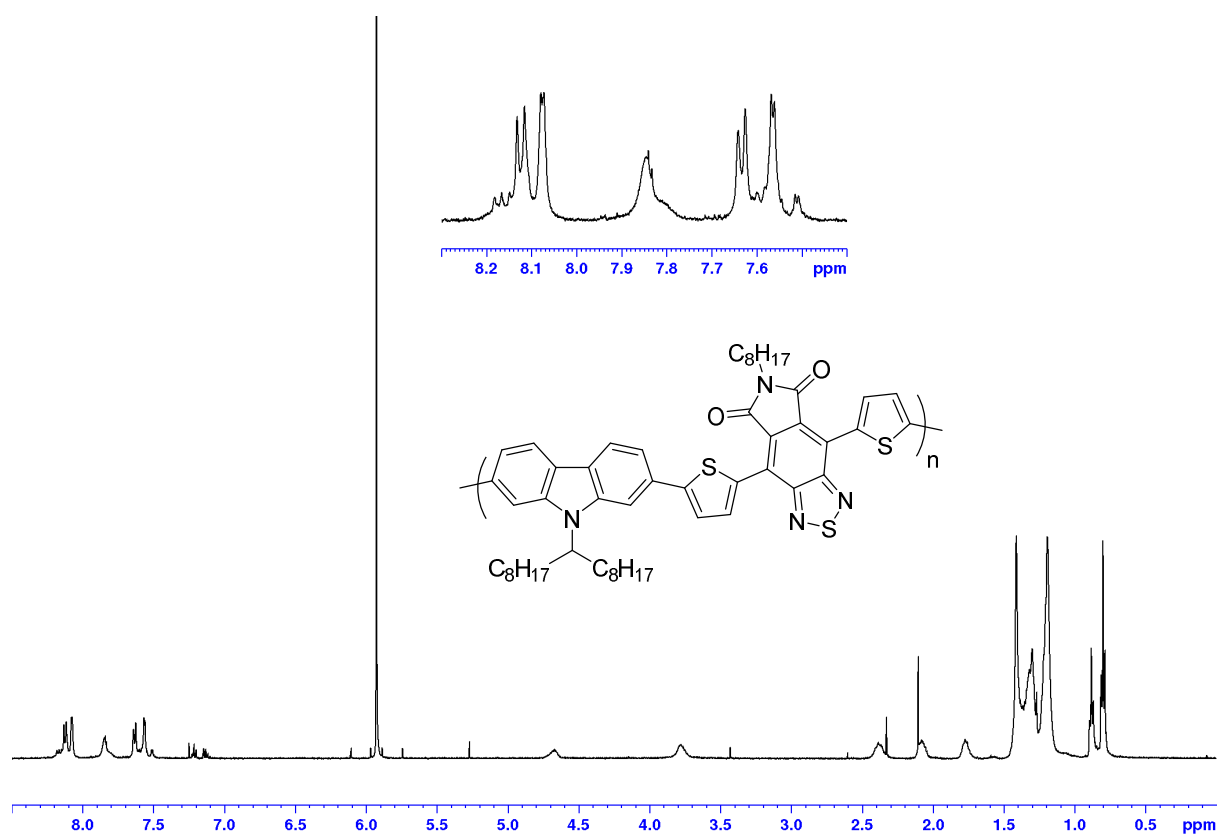

**Figure S2.**  $^1\text{H}$  NMR spectrum of PCDTBTDI-8 in  $\text{C}_2\text{D}_2\text{Cl}_4$  at 100  $^\circ\text{C}$

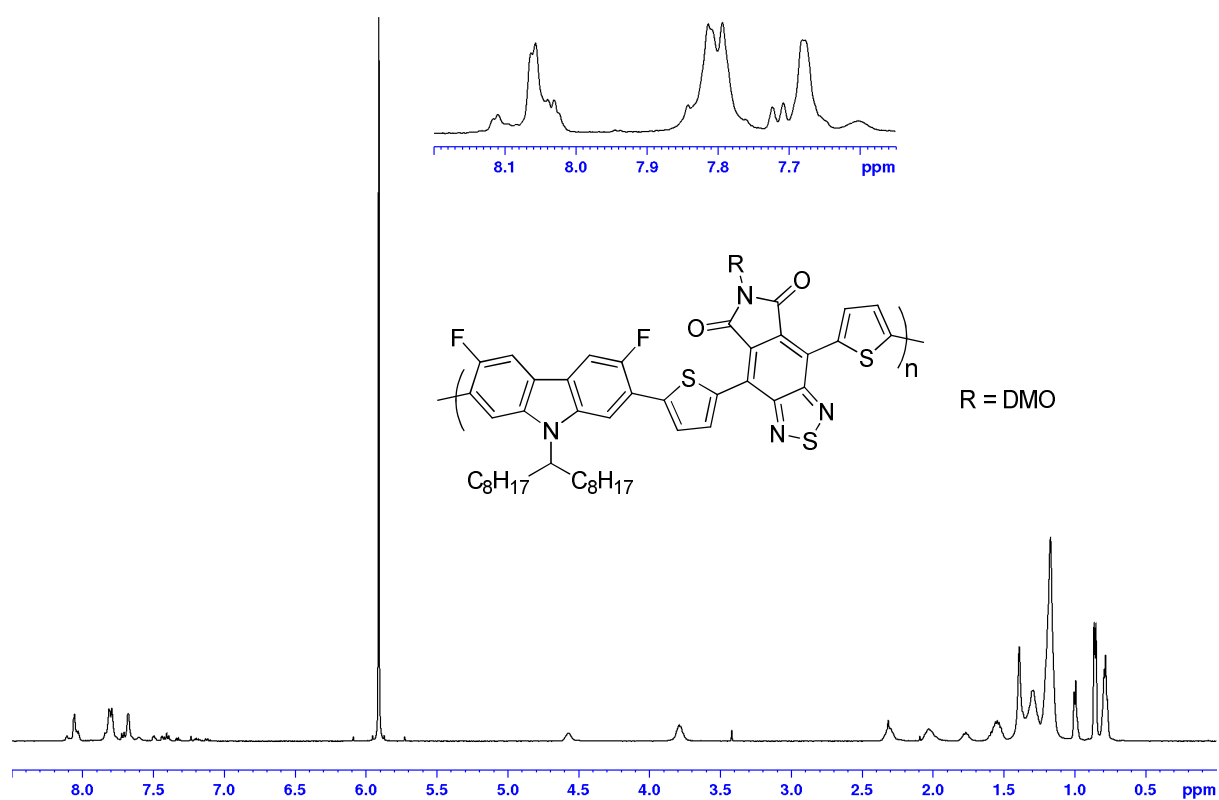

**Figure S3.**  $^1\text{H}$  NMR spectrum of **P2F-CDTBTDI-DMO** in  $\text{C}_2\text{D}_2\text{Cl}_4$  at  $100\text{ }^\circ\text{C}$

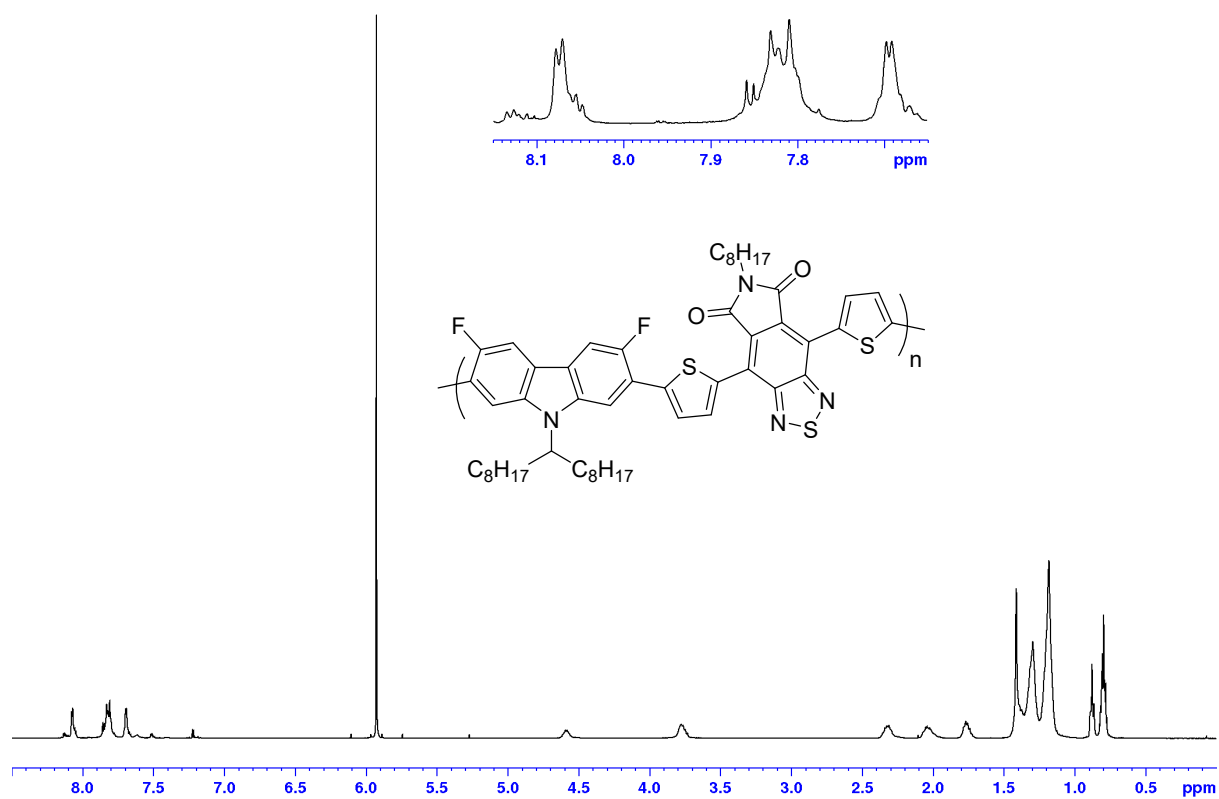

**Figure S4.**  $^1\text{H}$  NMR spectrum of P2F-CDTBTDI-8 in  $\text{C}_2\text{D}_2\text{Cl}_4$  at  $100^\circ\text{C}$
